# Supplementary material for: Investigating the Long-Term Effect of an Interdisciplinary Multimodal Rehabilitation Program on Levels of Bioactive Lipids and Telomerase Activity in Blood from Patients with Chronic Pain
Source: MDPI journal article supplement (doi:10.3390/jcm11051291), 2022-02-26
Supplement: s1 [file s1]

**Supplementary Table S1 - Bivariate correlations before the interdisciplinary multimodal rehabilitation program**

[illegible]

**Supplementary Table S2 - Bivariate correlations at the six-month follow-up of IMMRP**

[illegible]

**Supplementary Table S3 - Bivariate correlations:  $\Delta$ -Correlations (Pre-Post IMM RP)**

[illegible]

### **Supplementary Tables S1-S3**

Bivariate correlations of age (not in A2 and A3). BMI (not in A3). self-assessed pain intensity (NRS) and physical activity 1 and 2 (PA1 and PA2). The Hospital Anxiety (HADA) and Depression (HADD) Scale. Arachidonylethanolamide (AEA). 2-arachidonoylglycerol (2AG). palmitoylethanolamide (PEA). oleoylethanolamide (OEA). stearoylethanolamide (SEA) in nM. telomer length (TL) in t/S ratio. and telomerase activity (TA) in TPG units/  $\mu\text{L}$ . \* implies  $P \leq 0.05$  and \*\*  $P \leq 0.01$

**S1:** Correlations Pre the interdisciplinary multimodal rehabilitation program (IMMRP)

**S2** Correlations 6-month post IMMRP

**S3:**  $\Delta$ -correlations = values pre IMMRP – values post IMMRP
