# Supplementary material for: Investigating the Long-Term Effect of an Interdisciplinary Multimodal Rehabilitation Program on Levels of Bioactive Lipids and Telomerase Activity in Blood from Patients with Chronic Pain
Source: MDPI journal article supplement (doi:10.3390/jcm11051291), 2022-02-26
Supplement: s1 [file s1]

Supplementary File S1. List of prescription drug for patients before IPRP and after 6 months attending IPRP.

| <b>Before IPRP</b>  | Pat 1                   | Pat 2                   | Pat 3                     | Pat 4                   | Pat 5                     | Pat 6                   | Pat 7                     | Pat 8                   | Pat 9                           | Pat 10                  |
|---------------------|-------------------------|-------------------------|---------------------------|-------------------------|---------------------------|-------------------------|---------------------------|-------------------------|---------------------------------|-------------------------|
| <b>Drug</b>         | <b>Paraceta<br/>mol</b> | <b>Paraceta<br/>mol</b> | <b>Paracetam<br/>ol</b>   | <b>Paraceta<br/>mol</b> | <b>Buprenorph<br/>ine</b> | <b>Paraceta<br/>mol</b> | <b>Paracetam<br/>ol</b>   | <b>Paraceta<br/>mol</b> | <b>Paracetamol+cod<br/>eine</b> | <b>Paraceta<br/>mol</b> |
| Doses               | 665mg x6                | 2x 665 mg<br>x3         | 500mg x4                  | 665mg x<br>6            | 10mg/v                    | 665mg x 6               | 665mg x 6                 | 1g x 5                  | 500mgx1-2                       | 665mgx2-<br>3           |
| Days (last<br>week) | 7                       | 7                       | 7                         | 7                       | 7                         | 7                       | 7                         | 7                       | 4                               | 7                       |
| <b>Drug</b>         | <b>Naproxen</b>         |                         | <b>Chlorzoxaz<br/>one</b> | <b>Duloxetine</b>       | <b>Paracetamo<br/>l</b>   | <b>Duloxetine</b>       | <b>Naproxen</b>           |                         | <b>Amitriptyline</b>            | <b>Naproxen</b>         |
| Doses               | 250mg x2                |                         | 250mg x 4                 | 90mg x 1                | 665mg x 3                 | 60mg x 1                | 500mg x 2                 |                         | 10mgx6                          | 500mgx2                 |
| Days (last<br>week) | 1                       |                         | 7                         | 7                       | 7                         | 7                       | 7                         |                         | 7                               | 7                       |
| <b>Drug</b>         | <b>Omepraz<br/>ole</b>  |                         |                           | <b>Oxycodon<br/>e</b>   |                           | <b>Etoricoxib</b>       | <b>Chlorzoxaz<br/>one</b> |                         |                                 | <b>Codeine</b>          |
| Doses               | 20mg x 1                |                         |                           | 10mg x 2                |                           | 60mg x 1                | 50mg x 3                  |                         |                                 | 25mgx1-2                |
| Days (last<br>week) | 1                       |                         |                           | 7                       |                           | 7                       | 7                         |                         |                                 | 7                       |
| <b>Drug</b>         |                         |                         |                           | <b>Oxycodon<br/>e</b>   |                           |                         |                           |                         |                                 |                         |
| Doses               |                         |                         |                           | 5mg x 2                 |                           |                         |                           |                         |                                 |                         |
| Days (last<br>week) |                         |                         |                           | 7                       |                           |                         |                           |                         |                                 |                         |

| <b>6 months after<br/>IPRP</b> | Pat 1                   | Pat 2                   | Pat 3                           | Pat 4                   | Pat 5                     | Pat 6                     | Pat 7             | Pat 8                  | Pat 9                     | Pat 10                 |
|--------------------------------|-------------------------|-------------------------|---------------------------------|-------------------------|---------------------------|---------------------------|-------------------|------------------------|---------------------------|------------------------|
| <b>Drug</b>                    | <b>Paraceta<br/>mol</b> | <b>Paraceta<br/>mol</b> | <b>Paracetamol+co<br/>deine</b> | <b>Paraceta<br/>mol</b> | <b>Buprenorp<br/>hine</b> | <b>Chlorzoxaz<br/>one</b> | <b>Diclofenac</b> | <b>Pregab<br/>alin</b> | <b>Amitripty<br/>line</b> | <b>Metopr<br/>olol</b> |
| Doses                          | 665mg x<br>6            | 665 mg 2<br>x 3         | 500/30mg x 2                    | 665mg x<br>6            | 10mg                      | 3x1                       | 10mg 2x2          | 50mgx2                 | 1x1                       | 50mg x<br>1            |

|                  |                 |   |   |                   |                    |                    |                            |   |                    |   |
|------------------|-----------------|---|---|-------------------|--------------------|--------------------|----------------------------|---|--------------------|---|
| Days (last week) | 7               | 7 | 3 | 7                 | 7                  | 7                  | 7                          | 4 | 6                  | 7 |
| <b>Drug</b>      | <b>Naproxen</b> |   |   | <b>Duloxetine</b> | <b>Paracetamol</b> | <b>Paracetamol</b> | <b>Paracetamol</b>         |   | <b>Paracetamol</b> |   |
| Doses            | 250mg           |   |   | 90mg x 1          | 665mgx2x4          | 665mg x 6          | 1mg 2x2                    |   | 2x3                |   |
| Days (last week) | 2               |   |   | 7                 | 7                  | 7                  | 7                          |   | 2                  |   |
| <b>Drug</b>      |                 |   |   |                   | <b>0</b>           | <b>Naproxen</b>    | <b>Paracetamol+codeine</b> |   |                    |   |
| Doses            |                 |   |   |                   |                    | 500mg x 6          | 500/30mg x1                |   |                    |   |
| Days (last week) |                 |   |   |                   |                    | 7                  | 7                          |   |                    |   |
| <b>Drug</b>      |                 |   |   |                   |                    | <b>Naproxen</b>    |                            |   |                    |   |
| Doses            |                 |   |   |                   |                    | 250mg x 2          |                            |   |                    |   |
| Days (last week) |                 |   |   |                   |                    | 7                  |                            |   |                    |   |
